# Supplementary material for: Interactions between gold, thiol and As(iii) for colorimetric sensing
Source: Royal Society of Chemistry journal article supplement (doi:10.1039/d0an00946f), 2020-01-01
Supplement: d0an00946f1.pdf [file d0an00946f1.pdf]

## Electronic supplementary information

### Interactions between gold, thiol and As(III) for colorimetric sensing

Junling Duan<sup>1,2</sup>, Biwu Liu<sup>2</sup>, and Juewen Liu<sup>2\*</sup>

1. College of Chemistry and Material Science, Shandong Agricultural University,  
Tai'an, Shandong 271018, P.R. China
2. Department of Chemistry, Waterloo Institute for Nanotechnology, University of  
Waterloo, Waterloo, Ontario N2L 3G1, Canada

\* Corresponding authors:

Tel: +1 (519) 888-4567

Fax: +1 (519)-746-0435

*E-mail address:* liujw@uwaterloo.ca

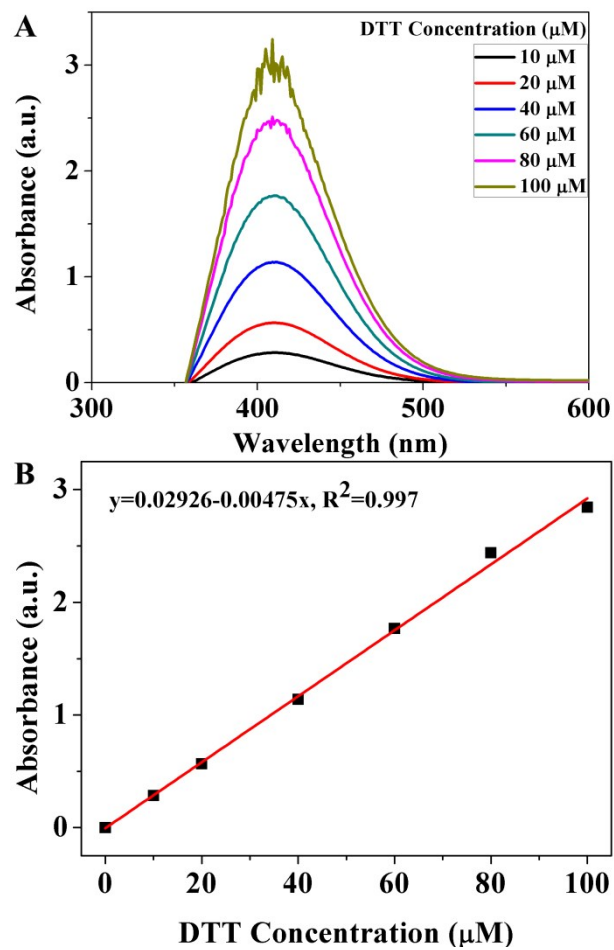

**Figure S1.** (A) The absorbance of DTT-DTNB complex in the presence of different concentrations of DTT. (B) The plot of absorbance versus DTT concentration.

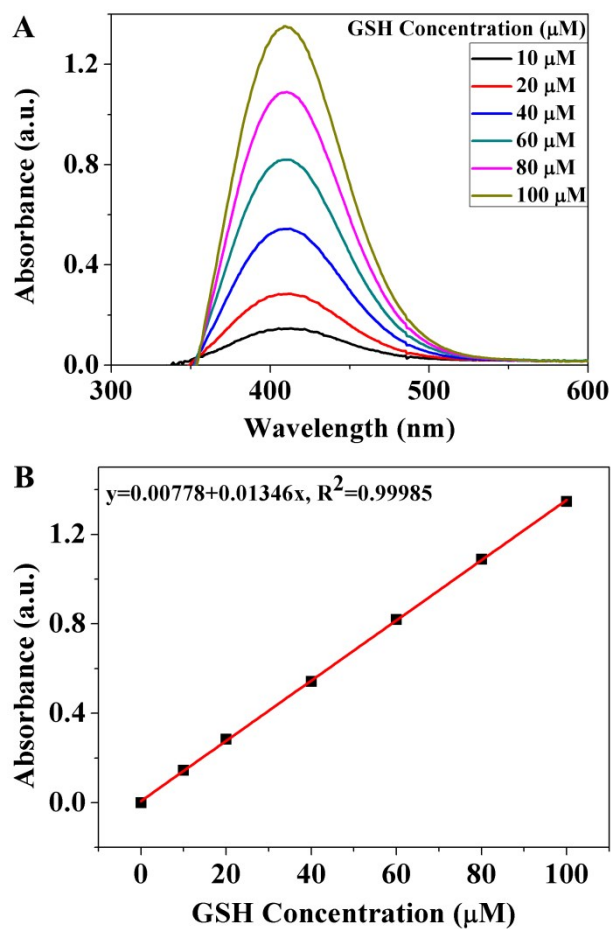

**Figure S2.** (A) The absorbance of GSH-DTNB complex in the presence of different concentrations of GSH. (B) The plot of absorbance versus GSH concentration.
